# Supplementary material for: Understanding how and why social prescribing supports young people waiting for mental health services: a qualitative study of mechanisms and contextual factors
Source: Research Square preprint supplement (doi:10.21203/rs.3.rs-8270082/v1), 2026-01-19
Supplement: Supplementary file 1 [file 4998949fc553d6803b87d714.docx]

**Appendix 3. Comparison of participant characteristics in qualitative sample and full intervention group sample**

| **Characteristic** | **Youths in qualitative sample (n=15)** | **Youths in full intervention group sample (n=322)** |
| --- | --- | --- |
| **Geographical region** | | |
| South West England | 3 (20.0%) | 40 (12.4%) |
| London and South East England | 3 (20.0%) | 67 (20.8%) |
| North East England | 4 (26.7%) | 173 (53.7%) |
| North West England | 2 (13.3%) | 89 (27.6%) |
| East of England | 3 (20.0%) | 82 (25.5%) |
| West Midlands | 0 (0.0%) | 85 (26.4%) |
| **Age** | | |
| 11 years | 4 (26.7%) | 44 (13.7%) |
| 12 years | 2 (13.3%) | 63 (19.6%) |
| 13 years | 2 (13.3%) | 63 (19.6%) |
| 14 years | 4 (26.7%) | 63 (19.6%) |
| 15 years | 1 (6.7%) | 51 (15.8%) |
| 16 years | 2 (13.3%) | 29 (9.0%) |
| >16 years | 0 (0.0%) | 9 (2.8%) |
| **Gender** | | |
| Male | 8 (53.3%) | 107 (33.2%) |
| Female | 5 (33.3%) | 205 (63.7%) |
| Non-binary | 2 (13.3%) | 2 (0.6%) |
| Prefer not to say | 0 (0.0%) | 5 (1.6%) |
| Other | 0 (0.0%) | 3 (0.9%) |
| **Ethnicity** | | |
| White | 10 (66.7%) | 288 (89.4%) |
| Black, African, Caribbean or Black British | 2 (13.3%) | 6 (1.9%) |
| Asian or Asian British | 0 (0.0%) | 6 (1.9%) |
| Mixed or multiple ethnic groups | 3 (20.0%) | 20 (6.2%) |
| Other ethnic groups | 0 (0.0%) | 2 (0.6%) |
| **Self-reported mental health difficulties** | | |
| Developmental difficulties | 5 (33.3%) | 63 (19.6%) |
| Eating difficulties | 4 (26.7%) | 65 (20.2%) |
| Mood difficulties | 14 (93.3%) | 255 (79.2%) |
| Behavioural difficulties | 9 (60.0%) | 181 (56.2%) |
| Personality difficulties | 2 (13.3%) | 64 (19.9%) |
| Seeing or feeling things which are not there | 3 (20.0%) | 36 (11.2%) |
| Anxiety difficulties | 13 (86.7%) | 273 (84.8%) |
| Substance use | 0 (0.0%) | 5 (1.56%) |
| Self-harm | 5 (33.3%) | 118 (36.6%) |
