# Supplementary material for: Understanding how and why social prescribing supports young people waiting for mental health services: a qualitative study of mechanisms and contextual factors
Source: Research Square preprint supplement (doi:10.21203/rs.3.rs-8270082/v1), 2026-01-19
Supplement: Supplementary file 2 [file ae1e708af9f5a40a2620aa4d.docx]

**Appendix 2. Interview guides**

**Interview topic guide for children and young people (social prescribing)**

**I. Opening**

Thank you for your time today. I would like to ask you some questions about your experience of waiting for mental health services, meeting with the link worker/social prescriber, and any activities that you might have attended after this meeting. The interview should last less than an hour. With your permission, I would like to record the interview. Would this be okay? Do you have any questions before we begin?

**II. The initial referral**

1. Can you tell me about your recent experiences of being referred to mental health services *(PROMPT: Who referred you, were you given any information, did you see anyone at the beginning?)*

**III. Experiences of waiting**

1. Can you tell me about your experiences while waiting to be seen by a mental health professional? (*PROMPT: how long did you have to wait? Was it explained to you that would have to wait and for how long?*
2. How did it feel to be on a waiting list?
3. Did being on a waiting list impact you in any way? If yes, in what way? *(PROMPT: mental health, social life and relationships, school activities, physical health)*

**IV. Coping strategies to support mental health**

1. Thinking about before you started this project, what kind of things would you normally do to make yourself feel happy or well? *(PROMPT: activities, services, treatments, people you would talk to)*

**V. Experiences of social prescribing**

**Meeting with the link worker/social prescriber**

1. Did you meet with the link worker/social prescriber at all?

**IF YES:**

1. Could you tell me about your experience of meeting with the link worker/social prescriber? *[PROMPTS: what was helpful? were there any challenges? was there anything you would like to have been done or said differently? Was it what you expected? If not, why not?]*
2. Did you find it easy or difficult to attend the meeting with the link worker/social prescriber? (*PROMPT: If so, what helped, if not, why? Were the meetings online or in-person and how did you feel about that)*
3. Did meeting with the link worker/social prescriber help how you have been feeling at all? (*PROMPT: If yes, why do you think it helped? If no, why not?)*

**IF NO:** Could you tell me why you did not meet with the link worker/social prescriber? *[PROMPTS: did you understand the purpose of the meeting and what would be involved? were you able to attend the meeting (if not, why not?), were there any other practical difficulties (location/cost?, did how you were feeling have any impact on your decision not to meet with them? is there anything that could have been done differently to help you meet with the link worker/social prescriber?)*

**Community activity/group engagement**

a) Could you tell me about any activities or groups you went to after meeting the link worker/social prescriber? *[prompts: types of activities, what was helpful, was anything difficult?]* ***IF NO ACTIVITIES – SKIP TO SECTION VII. Reasons for not taking part in community activities***

b) Did you find it easy or difficult to attend <activity>? *(PROMPT: If so, what helped, if not, why? Timing of sessions? Were you able to go to all the activity sessions? (PROMPT: If so, what helped, if not, why?)*

c) Did you find <activity> enjoyable? *(PROMPT: If yes, were there any specific parts of the <activity> that you enjoyed? Why did you enjoy them?)*

d) Were there any parts of <activity> that you did not enjoy? *(PROMPT: Why did you not enjoy them?)*

e) Did you find <activity> helped how you have been feeling at all? *(PROMPT: If yes, were there any specific parts of the <activity> that helped how you were feeling? Why do you think they helped?)*

f) Were there any aspects of <activity> that did not help how you have been feeling or made you feel worse? *(PROMPT: If yes, were there any specific parts of the <activity> that were not helpful?)*

g) Was there anything that could have been done differently to make <activity> more appealing? *(PROMPT: If yes, what could have been done differently)*

**VI. Intention to adopt and sustained use/engagement**

1. Since starting this project, what kind of things do you do to support your mental health? *(PROMPT activities, services, treatments, people you would talk to, is this different to the things you did before the project?)*
2. Is there anything you have taken from <activity> that you use, or plan to use in your everyday life? *(PROMPTS: Why/why not/how and when might you use them, what do you feel might be the challenges (if any) in using <activity> in everyday life?)*
3. How has taking part in <activity> supported you, if at all?

**VII. Reasons for not taking part in community activities (ONLY IF APPLICABLE)**

1. Can you tell me why you did not take part in any community activities? (*PROMPTS: did any of the activities on offer appeal to you? (If not, what would you like to have been offered?), did you understand the activities that were on offer and what would be involved?, were you able to attend any of the activities (if not, why not?), were there any other practical difficulties (location, costs)?, did how you were feeling have any impact on your decision not to take part?)*
2. Are you going to any other activities or services? (*PROMPT: If yes, what types of activities?*) Did this influence your decision not to take part?  *(PROMPT: Why/why not?)*
3. If the activities were offered outside of a research study, would that change whether or not you took part? *(PROMPT: Why/why not?)*
4. Is there anything that could have been done differently to make you want to take part in the activities?  (*PROMPT: If yes, what could have been done differently)*

**VIII. Closing**

I appreciate the time you took for this interview. Is there anything else that we have not covered that you would like to add?  Thank you for taking the time to talk to me.

**Interview topic guide for parents and guardians (social prescribing)**

**I. Opening**

Thank you for your time today. I would like to ask you some questions about your experiences and the experiences of your child in the Wellbeing While Waiting study. The interview should last less than an hour. With your permission, I would like to record the interview. Would this be okay? Do you have any questions before we begin?

**II. The initial referral**

1. Can you tell me about your experiences of your child being referred to mental health services? *(PROMPT: Who referred your child, were you/your child given any information, did you/your child see anyone at the beginning?)*

**III. Experiences of waiting**

1. Can you tell me about your experiences while your child was waiting to be seen by a mental health professional? (*PROMPT: how long did you/your child have to wait? Was it explained to you/your child that they would have to wait and for how long?)*
2. How did it feel to have your child on a waiting list?
3. Did your child being on a waiting list impact you in any way? If yes, in what way? *(PROMPT: mental health, physical health, social life and relationships)*
4. Do you think being on a waiting list impacted your child in any way? If yes, in what way? *(PROMPT: mental health, physical health, social life and relationships, school activities)*

**IV. Coping strategies to support mental health**

1. Thinking about before your child started the project, what kind of things would they normally do to support their mental health? *(PROMPT: activities, services, treatments, people they would talk to)*
2. Thinking about before you started the project, what kind of things would you normally do to support your mental health? *(PROMPT: activities, services, treatments, people they would talk to)*

**V. Experiences of social prescribing**

**Meetings with the link worker/social prescriber**

1. Did your child meet with the link worker/social prescriber at all? Did you attend the meeting with them?

**IF YES:**

1. Could you tell me about your experience/your child’s experience of meeting with the link worker/social prescriber? *[PROMPTS: what was helpful? were there any challenges? was there anything you would like to have been done or said differently? Was it what you expected? If not, why not?]*
2. Did you/they find it easy or difficult to attend the meeting with the link worker/social prescriber? (*PROMPT: If so, what helped, if not, why?)*
3. Did meeting with the link worker/social prescriber help how your child has been feeling at all? (*PROMPT: If yes, why do you think it helped? If no, why not?)*
4. Did meeting with the link worker/social prescriber support you at all? (*PROMPT: If yes, why do you think it helped? If no, why not?)*

**IF NO:** Could you tell me why your child did not meet with the link worker/social prescriber? *[PROMPTS: did you/they understand the purpose of the meeting and what would be involved? were you/they able to attend the meeting (if not, why not?), were there any other practical difficulties?, did how they were feeling have any impact on their decision not to meet with them? is there anything that could have been done differently to help your child meet with the link worker/social prescriber?)*

**Community activity/group engagement**

1. Could you tell me about any activities or groups your child went to after meeting the link worker/social prescriber? *[prompts: types of activities, what was helpful, was anything difficult?]* ***IF NO ACTIVITIES - SKIP TO SECTION VII. Reasons for your child not taking part in community activities***
2. Did your child find it easy or difficult to attend <activity>? (*PROMPT: If so, what helped, if not, why? Timing of sessions?* Were they able to go to all the activity sessions? (*PROMPT: If so, what helped, if not, why?)*
3. Did they find <activity> enjoyable? (*PROMPT: If yes, were there any specific parts of the <activity> that they enjoyed? Why did they enjoy them?)*
4. Were there any parts of <activity> that they did not enjoy? (PROMPT: *Why did they not enjoy them?)*
5. Did you find <activity> helped how your child has been feeling? (*PROMPT: If yes, were there any specific parts of the <activity> that helped how they were feeling? Why do you think they helped*?*)*
6. Did your child taking part in <activity> support you at all? (*PROMPT: If yes, what helped? why do you think it helped*?*)*
7. Were there any aspects of <activity> that did not help how your child has been feeling or made them feel worse? (*PROMPT: If yes, were there any specific parts of the <activity> that were not helpful?)*
8. Was there anything that could have been done differently to make <activity> more appealing to your child? (*PROMPT: If yes, what could have been done differently)*

**VI. Intention to adopt and sustained use/engagement**

1. Since starting this project, what kind of things does your child do to support their mental health? *(PROMPT activities, services, treatments, people they would talk to, is this different to the things they did before the project?)*
2. Since starting this project, what kind of things do you do to support your mental health? *(PROMPT activities, services, treatments, people you would talk to, is this different to the things you did before the project?)*
3. Is there anything your child has taken from <activity> that they use in everyday life? *(PROMPTS: Why/why not/how and when might they use them, what do you feel might be the challenges (if any) for your child using <activity> in everyday life?)*
4. How has taking part in <activity> supported your child, if at all?
5. How has your child taking part in <activity> supported you, if at all?

**VII. Reasons for your child not taking part in community activities** **(ONLY IF APPLICABLE)**

1. Can you tell me why your child did not take part in any community activities? (*PROMPTS: did any of the activities on offer appeal to them? (If not, what would they like to have been offered?), did they understand the activities that were on offer and what would be involved? were they able to attend any of the activities (if not, why not?), were there any other practical difficulties, did how they were feeling have any impact on their decision not to take part?)*
2. Is your child going to any other activities or services? Did this influence their decision not to take part?
3. If the activities were offered outside of a research study, would that change whether or not they took part?
4. Is there anything that could have been done differently to make your child want to take part in the activities?  (*PROMPT: If yes, what could have been done differently)*

**VIII. Closing**

I appreciate the time you took for this interview. Is there anything else that we have not covered that you would like to add?  Thank you for taking the time to talk to me.
