# Supplementary material for: Understanding how and why social prescribing supports young people waiting for mental health services: a qualitative study of mechanisms and contextual factors
Source: Research Square preprint supplement (doi:10.21203/rs.3.rs-8270082/v1), 2026-01-19
Supplement: Supplementary file 3 [file d4f823e8512f2be8d47a2390.docx]

**Appendix 1. Consolidated criteria for reporting qualitative studies (COREQ): 32-item checklist**

| **No. Item** | **Guide questions/description** | **Reported on Page #** |
| --- | --- | --- |
| **Domain 1: Research team and reﬂexivity** |  |  |
| *Personal Characteristics* |  |  |
| 1. Inter viewer/facilitator | Which author/s conducted the interview or focus group? | EH, ABr |
| 2. Credentials | What were the researcher’s credentials? E.g. PhD, MD | EH: PhD, MSc, BA  ABr: MA, BA |
| 3. Occupation | What was their occupation at the time of the study? | EH: Post-doctoral research fellow  ABr: Research Programmes Manager / Research Fellow |
| 4. Gender | Was the researcher male or female? | EH: Female  ABr: Female |
| 5. Experience and training | What experience or training did the researcher have? | EH, ABr: experience conducting qualitative interviews with young people and caregivers, including those with mental health difficulties |
| *Relationship with participants* |  |  |
| 6. Relationship established | Was a relationship established prior to study commencement? | No |
| 7. Participant knowledge of the interviewer | What did the participants know about the researcher? e.g. personal goals, reasons for doing the research | Interviewers explained to participants that the study aimed to understand their experiences of social prescribing to inform future improvement of social prescribing services for young people. |
| 8. Interviewer characteristics | What characteristics were reported about the inter viewer/facilitator? e.g. Bias, assumptions, reasons and interests in the research topic | EH: none reported  ABr: none reported |

| **Domain 2: study design** |  |  |
| --- | --- | --- |
| *Theoretical framework* |  |  |
| 9. Methodological orientation and Theory | What methodological orientation was stated to underpin the study? e.g. grounded theory, discourse analysis, ethnography, phenomenology, content analysis | Reflexive thematic analysis (page 7) |
| *Participant selection* |  |  |
| 10. Sampling | How were participants selected? e.g. purposive, convenience, consecutive, snowball | Purposive sampling (page 4) |
| 11. Method of approach | How were participants approached? e.g. face-to-face, telephone, mail, email | Participants were first approached via email or telephone depending on their contact preferences. A follow-up call was also made to those who did not respond to two emails. A maximum of three contact attempts were made for each participant. |
| 12. Sample size | How many participants were in the study? | 32 (15 young people and 17 caregivers) |
| 13. Non-participation | How many people refused to participate or dropped out? Reasons? | Eight young people and three caregivers declined due to lack of time or interest, 57 young people and 41 caregivers did not respond, while two young people and one caregiver did not turn up for interviews. |
| *Setting* |  |  |
| 14. Setting of data collection | Where was the data collected? e.g. home, clinic, workplace | Remotely via Microsoft Teams or telephone |
| 15. Presence of non-participants | Was anyone else present besides the participants and researchers? | No |
| 16. Description of sample | What are the important characteristics of the sample? e.g. demographic data, date | Geographical location, age, gender, ethnicity, self-reported mental health difficulties, level of social prescribing engagement (pages 5-6) |
| *Data collection* |  |  |
| 17. Interview guide | Were questions, prompts, guides provided by the authors? Was it pilot tested? | Interviews were semi-structured based on a topic guide (Appendix 3) |
| 18. Repeat interviews | Were repeat interviews carried out? If yes, how many? | No |
| 19. Audio/visual recording | Did the research use audio or visual recording to collect the data? | Interviews were audio- or video-recorded depending on participants’ preferences. |
| 20. Field notes | Were ﬁeld notes made during and/or after the interview or focus group? | No |
| 21. Duration | What was the duration of the inter views or focus group? | 17-57 minutes (averaging 28 minutes) |
| 22. Data saturation | Was data saturation discussed? | The concept of data saturation is not considered appropriate within reflexive thematic analysis. Instead, the concept of information power was discussed (page 5). |
| 23. Transcripts returned | Were transcripts returned to participants for comment and/or correction? | No |
| **Domain 3: analysis and ﬁndings** |  |  |
| *Data analysis* |  |  |
| 24. Number of data coders | How many data coders coded the data? | One |
| 25. Description of the coding tree | Did authors provide a description of the coding tree? | Yes (page 8) |
| 26. Derivation of themes | Were themes identiﬁed in advance or derived from the data? | Themes were developed inductively from the data |
| 27. Software | What software, if applicable, was used to manage the data? | NVivo |
| 28. Participant checking | Did participants provide feedback on the ﬁndings? | No |
| *Reporting* |  |  |
| 29. Quotations presented | Were participant quotations presented to illustrate the themes/ﬁndings? Was each quotation identiﬁed? e.g. participant number | Quotes with participants numbers are presented throughout the results section (pages 8-15). |
| 30. Data and ﬁndings consistent | Was there consistency between the data presented and the ﬁndings? | Yes (pages 8-15) |
| 31. Clarity of major themes | Were major themes clearly presented in the ﬁndings? | Yes (pages 8-15) |
| 32. Clarity of minor themes | Is there a description of diverse cases or discussion of minor themes? | Yes (pages 8-15) |
